# Supplementary material
Source: PubMed Central journal article supplement (PMC4734612)
Supplement: am5b10942_si_001.pdf [file am5b10942_si_001.pdf]

# Supporting Information

## Functionalized Mesoporous Silica *via* an Aminosilane Surfactant Ion Exchange Reaction: Controlled Scaffold Design and Nitric Oxide Release

*Robert J. Soto, Lei Yang, and Mark H. Schoenfish\**

Department of Chemistry, University of North Carolina at Chapel Hill, CB 3290, Chapel Hill, NC 27599, United States<sup>‡</sup>

\*To whom correspondence should be addressed: [schoenfish@unc.edu](mailto:schoenfish@unc.edu)

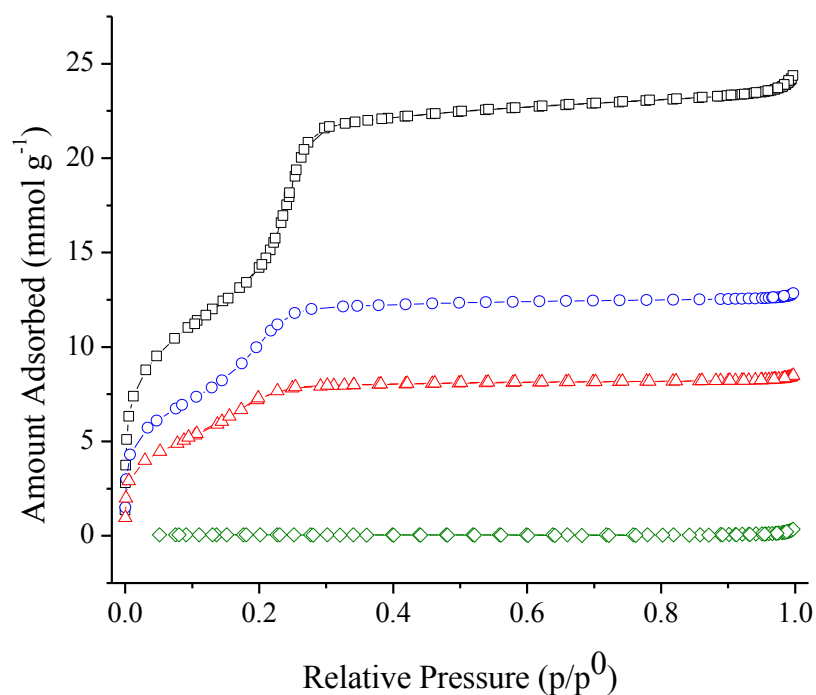

**Figure S1.** Nitrogen sorption isotherms for 1100 nm AEAP3-modified MSNs at reaction AEAP3 concentrations of 0 (black, square), 1.4 (blue, circle), 2.9 (red, triangle), and 11.5 mM (green, diamond). Data for the 5.7 mM AEAP3-based synthesis was omitted for clarity, as the isotherm overlapped with that for the 11.5 mM synthesis.

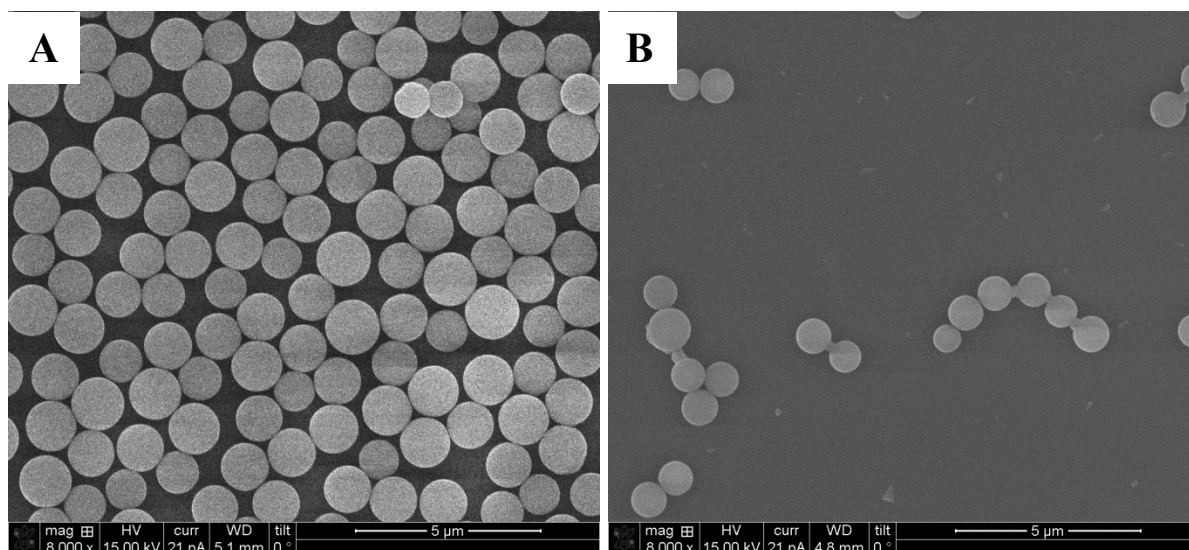

**Figure S2.** Scanning electron micrographs of 1100 nm AEAP3-modified particles with reactant AEAP3 concentrations of (A) 11.47 mM and (B) 14.34 mM. While the particles in (A) exhibited smooth morphology, undesirable particle agglomeration occurred at higher AEAP3 concentrations.

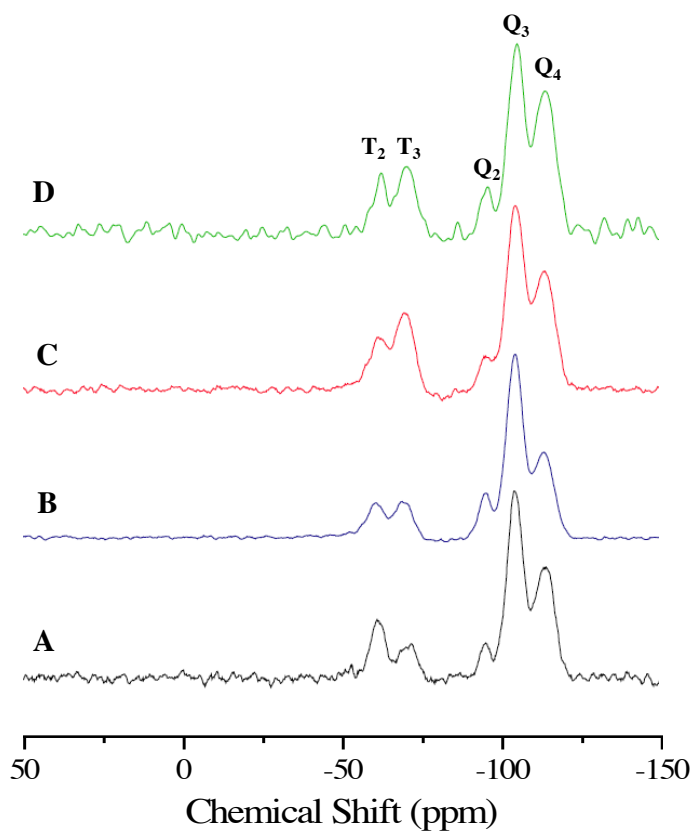

**Figure S3.** Solid-state CP/MAS  $^{29}\text{Si}$  NMR spectra of (A) 1100; (B) 450; (C) 150; and (D) 30 nm AEAP3-modified

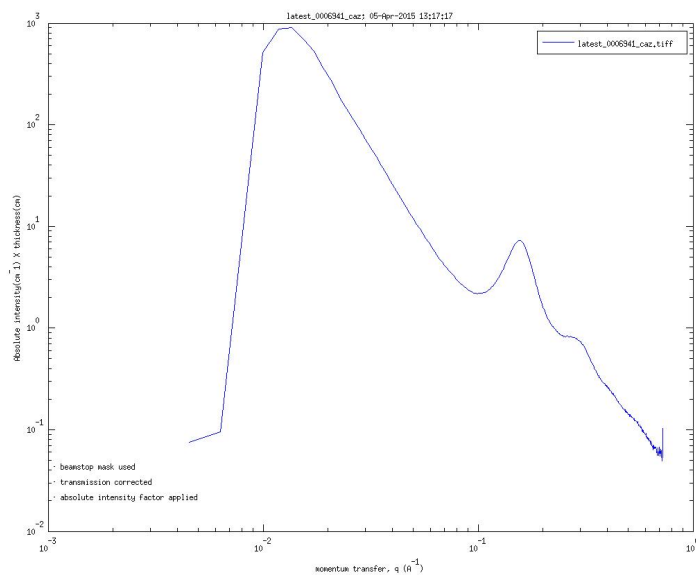

**Figure S4.** Raw X-ray scattering profile for unmodified 30 nm MSNs. The absence of low-angle (i.e.,  $<0.1 \text{ \AA}^{-1}$ ) waves corresponding to scattering from individual particles should be noted.

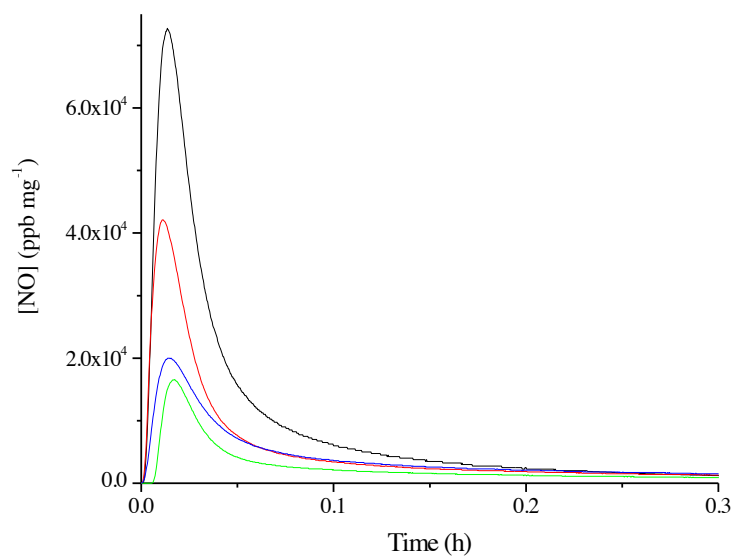

**Figure S5.** Real-time NO-release profiles for 30 nm MAP3/NO (black), AHAP3/NO (red), AEAP3/NO (green), and DET3/NO (blue) particles after  $\sim 20$  min in PBS (pH 7.4) at  $37 \text{ }^\circ\text{C}$ .

**Table S1.** Characterization of AEAP3-modified 1100 nm mesoporous silica particles as a function of reaction aminosilane concentration.<sup>a</sup>

| <b>[AEAP3] (mM)</b> | <b>t<sub>1/2</sub> (min)<sup>b</sup></b> | <b>t<sub>d</sub> (h)<sup>c</sup></b> | <b>[NO]<sub>t</sub> (μmol mg<sup>-1</sup>)<sup>d</sup></b> |
|---------------------|------------------------------------------|--------------------------------------|------------------------------------------------------------|
| 1.43                | 14.2±1.6                                 | 7.2±1.2                              | 0.56±0.09                                                  |
| 2.87                | 15.8±4.2                                 | 7.5±0.3                              | 0.69±0.04                                                  |
| 5.73                | 16.8±4.1                                 | 9.0±0.5                              | 1.02±0.04                                                  |
| 11.47               | 25.6±5.0                                 | 11.1±0.7                             | 1.41±0.19                                                  |

<sup>a</sup>Error bars represent standard deviation for n≥3 separate syntheses. <sup>b</sup>Half-life of NO release. <sup>c</sup>NO-release duration; time required for NO concentrations to reach ≤10 ppb mg<sup>-1</sup>. <sup>d</sup>Total NO release.

**Table S2.** Elemental analysis of 150 nm APTES, BTMS, and MPTMS particles.

| <b>Silane Modification</b> | <b>Carbon wt%</b> | <b>Hydrogen wt%</b> | <b>Nitrogen wt%</b> |
|----------------------------|-------------------|---------------------|---------------------|
| APTES                      | 13.21             | 4.08                | 4.49                |
| BTMS                       | 23.16             | 4.79                | 0.16                |
| MPTMS                      | 25.58             | 4.84                | 0.88                |

### Sample calculation of *N*-diazoniumdiolate formation efficiency for AEAP3 MSNs:

For 1100 nm AEAP3 MSNs, a nitrogen content of 4.87% was measured by elemental analysis.

$$4.87\% = \frac{0.0487 \text{ mg nitrogen}}{1 \text{ mg scaffold}}$$

$$\frac{0.0487 \text{ mg nitrogen}}{1 \text{ mg scaffold}} * \frac{1 \text{ g nitrogen}}{1000 \text{ mg nitrogen}} * \frac{1}{14.007 \frac{\text{g}}{\text{mol}} \text{ nitrogen}} * \frac{10^6 \mu\text{mol}}{1 \text{ mol}} = \frac{3.48 \mu\text{mol nitrogen}}{\text{mg}}$$

$$\frac{3.48 \mu\text{mol nitrogen}}{\text{mg}} * \frac{1 \text{ mol secondary amine}}{2 \text{ mol amine}} = \frac{1.74 \mu\text{mol secondary amine}}{\text{mg}}$$

Upon *N*-diazoniumdiolate formation, two moles of NO react with one mole of secondary amine. The theoretical maximum NO storage is thus:

$$\frac{1.74 \mu\text{mol secondary amine}}{\text{mg}} * \frac{2 \text{ mol NO}}{1 \text{ mol secondary amine}} = \frac{3.48 \mu\text{mol NO}}{\text{mg}}$$

Compare to the actual NO storage as measured by chemiluminescence (1.41  $\mu\text{mol}/\text{mg}$ ):

$$\frac{1.41 \mu\text{mol NO}/\text{mg}}{3.48 \mu\text{mol NO}/\text{mg}} * 100 = 40.7\%$$
